27 **Abstract**

28 MicroRNA (miRNAs) are pleiotropic post-transcriptional modulators of gene expression. Its  
29 inherently pleiotropic nature make miRNAs strong candidates for the development of cancer  
30 therapeutics, yet despite its potential, there remains a challenge to deliver nucleic acid-based  
31 therapies into cancer cells. We developed a novel approach to modify miRNAs by replacing the  
32 uracil bases with 5-fluorouracil (5-FU) in the guide strand of tumor suppressor miRNAs, thereby  
33 combining the therapeutic effect of 5-FU with tumor suppressive effect of miRNAs to create a  
34 potent, multi-targeted therapeutic molecule without altering its native RNA interference (RNAi)  
35 function. To demonstrate the general applicability of this approach to other tumor suppressive  
36 miRNAs, we screened a panel of 12 novel miRNA mimetics in several cancer types including  
37 leukemia, breast, gastric, lung, and pancreatic cancer. Our results show that 5-FU-modified  
38 miRNA mimetics have increased potency (low nM range) in inhibiting cancer cell proliferation  
39 and that these mimetics can be delivered into cancer cells without delivery vehicle both *in vitro*  
40 and *in vivo*, thus representing significant advancements in the development of therapeutic  
41 miRNAs for cancer. This work demonstrates the potential of fluoropyrimidine modifications that  
42 can be broadly applicable and may serve as a platform technology for future miRNA and nucleic  
43 acid-based therapeutics.

44

45

46

47

48

49

50

51

52

## 53 **Introduction**

54           MicroRNAs (miRNAs) are a class of short non-coding RNA that were discovered in 1993  
55 and were observed to have critical regulatory functions, regulating protein biosynthesis via direct  
56 interaction with the 3' untranslated region (3'-UTR) of target mRNA transcripts.<sup>1,2</sup> MiRNA are  
57 key mediators of the RNA interference (RNAi) pathway and its interactions are largely governed  
58 by its seed sequence on the 5' end of the miRNA. They are thus pleiotropic regulators of gene  
59 expression, where one particular miRNA can interact with multiple mRNA target transcripts.  
60 There are numerous studies demonstrating the critical roles of miRNAs in human disease and  
61 miRNA expression is often dysregulated in cancer. Due to their impact on numerous  
62 biochemical pathways, different miRNAs have been observed to either promote or inhibit  
63 tumorigenesis and tumor growth in cell context-dependent manner. These miRNAs are referred  
64 to as oncogenic miRNAs (oncomiRs) and tumor suppressor miRNAs respectively.<sup>3</sup> miR-15 was  
65 the first miRNA to be found either absent or downregulated in cancer and it was subsequently  
66 discovered that it modulates apoptosis by directly regulating BCL2 expression.<sup>4,5</sup> Since then,  
67 numerous cancer types have been shown to have dysregulated tumor suppressor miRNA  
68 expression. The functional significance of miRNAs in cancer has also been further studied, and  
69 tumor suppressor miRNAs that regulate key oncogenic pathways—such as apoptosis,  
70 proliferation, autophagy, cell cycle, and epithelial-to-mesenchymal (EMT) transition—have been  
71 identified and studied.<sup>6-13</sup> Experimental evidence that demonstrates the key role of miRNAs in  
72 these pathways reveals the therapeutic potential for tumor suppressor miRNAs.

73           There are, however, several hurdles need to be overcome to realize the therapeutic  
74 potential of miRNAs. One of the major bottlenecks in the development of nucleic acid-based  
75 medicine is the efficient intracellular delivery of these molecules. Tremendous effort in the past  
76 several decades has been devoted to developing delivery vehicle technologies and various  
77 lipid-based nanoparticles—including liposomes, micelles, and dendrimers—have grown in  
78 popularity.<sup>14,15</sup> Many of these lipid nanoparticles (LNPs) function as cationic polymers that

79 facilitate the transport of oligonucleotides across the plasma membrane. Despite the  
80 advancements in lipid-based delivery systems, there are still barriers to its use. LNPs still face  
81 several challenges such as their instability, rapid systemic clearance, and toxicities—including  
82 their induction of immunostimulatory responses. In preclinical studies, LNPs are known to  
83 exhibit some cytotoxicity in various cell lines and mice treated with some formulations of  
84 positively-charged LNPs showed increased liver enzymes and body weight loss.<sup>16,17</sup> In humans,  
85 anti-polyethylene glycol (PEG) antibodies are generated from pegylated drugs, including LNP  
86 formulations, and PEG-induced complement activation has also been observed.<sup>18-21</sup> Toll-like  
87 receptors (TLRs) are involved in the innate immune response and typically recognize molecular  
88 patterns associated with pathogens.<sup>22</sup> TLR-4 activation has also been reported with the use  
89 LNPs.<sup>16</sup> These toxicities are particularly problematic as they are often observed when LNPs are  
90 delivered systemically, the main route of delivery in cancer therapy.<sup>23-25</sup>

91 Other approaches to enhance delivery include the modification of the nucleic acids  
92 themselves. Modifications of the sugar-phosphate backbone and/or the base have been shown  
93 to enhance delivery, stability, and potency of various nucleic acid-based therapeutics.<sup>26</sup> 5-  
94 fluorouracil (5-FU) is a pyrimidine analog and is converted to fluorodeoxyuridylate (FdUMP) to  
95 inhibit the sole *de novo* biosynthesis of thymidylate by the formation of suicide ternary complex  
96 with its target enzyme protein thymidylate synthase (TS) along with tetrahydrofolate.<sup>27</sup> Due to  
97 this antimetabolite effect, 5-FU has been used as a major chemotherapeutic agent for many  
98 cancer types. 5-FU can be incorporated into the miRNA molecule and we have previously taken  
99 this approach with three tumor suppressor miRNAs—miR-15a, miR-129, and miR-489—and  
100 have demonstrated that 5-FU modification of these miRNAs are an effective and potent cancer  
101 therapeutic in *in vivo* mouse models of colon, pancreatic, and breast cancer.<sup>28-31</sup> Additionally,  
102 this modification confers increased intracellular stability of the miRNA, a novel ability to be  
103 delivered into cells without use of delivery vehicle, and retention of target specificity. This  
104 modification strategy greatly overcomes some of the bottlenecks of nucleic acid-based drug

105 development by improving the deliverability of miRNAs as well enhancing its potency. To  
106 demonstrate the general applicability of this concept, we took this unique 5-FU modification-  
107 approach to develop a miRNA strategy that can be implemented as a platform for miRNA-based  
108 cancer therapeutics.

109 In this study, we selected 12 well-studied tumor suppressor miRNAs (hsa-let-7a, hsa-  
110 miR-15a, hsa-miR-34, hsa-miR-129, hsa-miR-140, hsa-miR-145, hsa-miR-194, hsa-miR-200a,  
111 hsa-miR-200b, hsa-miR-200c, hsa-miR-215, and hsa-miR-506) as candidates to apply this  
112 modification strategy.<sup>6-13,32-37</sup> These tumor suppressor miRNAs are often dysregulated in cancer  
113 cells and play important roles in multiple pathways regulating the cell cycle, apoptosis, EMT,  
114 metastasis, and drug resistance.<sup>38</sup> We substituted the uracil bases on the guide strand of the  
115 miRNAs with 5-FU and screened these 5-FU-modified miRNA mimetics for efficacy in various  
116 cancer types. The passenger strand of miRNA was left unmodified to avoid potential off-target  
117 effects and to preserve the function of miRNA. Notably, 5-FU modification does not affect  
118 Watson-Crick base-pairing, as the fluorine substituted for the hydrogen at the 5-carbon is not  
119 involved in normal hydrogen bonding between nucleobases. This unique strategy combines the  
120 therapeutic effect of 5-FU with the tumor suppressor function of miRNAs to inhibit multiple  
121 oncogenic targets and pathways of cancer cells. Our results show that these 5-FU-modified  
122 miRNA mimetics were able to reduce cancer cell proliferation with enhanced potency while  
123 preserving target specificity. Lastly, the therapeutic effects were achieved without the aid of any  
124 delivery vehicle both *in vitro* and *in vivo*.

125

## 126 **Results**

### 127 **Sequence and structure of the miRNA mimetics with 5-FU modification**

128 To evaluate 5-FU modification as a universal strategy for all tumor suppressor miRNAs and for  
129 multiple major cancer types, we selected twelve tumor suppressor miRNAs that are well studied  
130 in several cancer types, including in gastric cancer, lung cancer, breast cancer, leukemia, and

131 pancreatic cancer: hsa-let-7a, hsa-miR-15a, hsa-miR-34, hsa-miR-129, hsa-miR-140, hsa-miR-  
132 145, hsa-miR-194, hsa-miR-125, hsa-miR-200a, hsa-miR-200b, hsa-miR-200c, and hsa-miR-  
133 506 (herein after referred to without their hsa- prefix which refers to their human species of  
134 origin). We designed a panel of 5-FU-modified miRNAs by substituting the uracil bases of the  
135 guide strand of the mature miRNA with the antimetabolite nucleoside analog 5-FU (**Figure 1**).

136

### 137 **Toxicity of Nucleic Acid Delivery Vehicle**

138 To demonstrate the cytotoxicity of delivery vehicles, both gastric cancer AGS and lung  
139 cancer A549 cells were treated with a polyethyleneimine-based lipid nanoparticle (*in vivo*-  
140 jetPEI®, Polyplus) and a dose-dependent increase in apoptosis was observed (**Figure 2**). It is  
141 clearly evidenced that while PEI has minimal impact on cell death at low concentrations, PEI is  
142 cytotoxic at higher concentration and triggers apoptosis.

143

### 144 **5-FU-modified miRNA mimetics display enhanced efficacy at inhibiting cancer** 145 **proliferation and can enter the cell without the use of delivery vehicle**

146 To systematically confirm that vehicle-free delivery of the 5-FU-modified miRNA  
147 mimetics is a reproducible, sequence-independent feature and that is also not dependent on the  
148 number of 5-FU substitutions, we explored the efficacy of our panel of 5-FU-modified miRNAs in  
149 different tumor types, we performed a screen by treating cells with 50 nM of the 5-FU-modified  
150 miRNAs without the use of delivery vehicle in the following cell lines: AGS gastric cancer cells,  
151 A549 lung cancer cells, SBKR3 breast cancer cells, REH leukemia cells, and AsPC-1, Hs766T,  
152 and PANC-1 pancreatic cancer cells (**Figure 3**). Our results clearly show that while unmodified,  
153 control miRNAs have no effect due to the inability to cross the cell membrane, the 5-FU  
154 modified miRNA mimetics are all showing efficacy to inhibit cancer cell proliferation (**Figure 3**).

155 In addition to vehicle free delivery, there is enhanced therapeutic efficacy of 5-FU-  
156 modified miRNA mimetics compared to their unmodified, native counterparts in both AGS cells

157 **(Table 1)** and A549 cells **(Table 2)**. In AGS cells, there is an 8.4-fold increase in the inhibition of  
158 cell proliferation after 5-FU modification of let-7a (let-7a  $IC_{50}$  = 59.5 nM vs. 5-FU-let-7a  $IC_{50}$  = 7.1  
159 nM) **(Figure 4A)** and a 4.3-fold increase for miR-145 (miR-145  $IC_{50}$  = 20.9 nM vs. 5-FU-miR-145  
160  $IC_{50}$  = 4.9 nM) **(Figure 4B)**. Similarly, in A549 cells, there is a 6.3-fold increase in the inhibition  
161 of cell proliferation after modification of let-7a with 5-FU (let-7a  $IC_{50}$  = 143.5 nM vs. 5-FU-let-7a  
162  $IC_{50}$  = 22.8 nM) **(Figure 4C)** and a 13.8-fold increase for miR-145 (miR-145  $IC_{50}$  = 51.7 nM vs. 5-  
163 FU-miR-145  $IC_{50}$  = 11.0 nM) **(Figure 4D)**.

164 To further confirm that miRNAs 5-FU-let-7a and 5-FU-miR-145 can enter the cell without  
165 the use of transfection vehicle, AGS and A549 cells were treated let-7a and miR-145 without the  
166 use of vehicle. There is no inhibition of cell proliferation in cells treated with let-7a and miR-145  
167 without the use of vehicle **(Figure 4E-4H)** compared to cells treated with let-7a and miR-145 in  
168 the presence of vehicle **(Figure 4A-4D)**. Notably, 5-FU-let-7a and 5-FU-miR-145 has a  
169 significant inhibition of proliferation despite the absence of delivery vehicle **(Figure 4E-4H)**.

170 The main mechanism of action of 5-FU is forming an irreversible, covalent ternary  
171 complex with thymidylate synthase (FdUMP-TS) and tetrahydrofolate. To investigate whether  
172 the enhanced efficacy of 5-FU-modified miRNA mimetics are due to the release of 5-FU,  
173 western immunoblot analysis of thymidylate synthase (TS) was used to detect the presence of  
174 the FdUMP-TS complex. We probed for TS to evaluate whether the 5-FU-modified miRNA  
175 mimetics exerted a 5-FU effect. Upon western immunoblot analysis, we observed that 5-FU-let-  
176 7a and 5-FU-miR-145 exerts a 5-FU effect as observed by the formation of FdUMP-TS  
177 complex, represented as the upper band, in both AGS cells **(Figure 5A & 5B)** and in A549 cells  
178 **(Figure 5C & 5D)**.

179

### 180 **Target specificity of 5-FU-modified miRNA mimetics**

181 To confirm the target specificity of the 5-FU-modified miRNA mimetics, we performed  
182 western blot analysis on known targets of let-7a and miR-145. Cyclin-dependent kinase 6

183 (CDK6) is a direct target of let-7a.<sup>39,40</sup> Similarly, specificity protein 1 (SP1) is a direct target of  
184 miR-145.<sup>41,42</sup> In both AGS gastric cancer cells and A549 lung cancer cells 5-FU-let-7a  
185 decreases CDK6 expression (**Figure 6A & 6B**) and 5-FU-miR-145 decreases SP1 expression  
186 under vehicle-free conditions (**Figure 6C & 6D**). To further confirm that 5-FU-modified miRNA  
187 mimetics are effective under vehicle-free conditions, we performed western blot analysis of  
188 checkpoint kinase 1 (CHK1) and WEE1 G2 checkpoint kinase (WEE1), two direct targets of  
189 miR-15a.<sup>29</sup> 5-FU-miR-15a decreases the expression of both CHK1 and WEE1, whereas neither  
190 miR-15a, 5-FU, nor the combination of the two decreases target protein expression under  
191 vehicle-free conditions (**Figure 6E**).

192

### 193 **Therapeutic efficacy and safety of 5-FU-modified miRNA mimetics *in vivo***

194 To demonstrate the therapeutic efficacy of 5-FU modified miRNA mimetics *in vivo*, with  
195 and without the delivery vehicle, we choose 5-FU-miR-15a as our top candidate based on the *in*  
196 *vitro* efficacy screening. The *in vivo* effects of a 5-FU-modified miRNA mimetic, 5-FU-miR-15a,  
197 was evaluated in a CT-26 syngeneic mouse colon cancer model. Mice were treated with PEI  
198 vehicle alone, 40 µg of 5-FU-miR-15a with PEI vehicle, or 40 µg of 5-FU-miR-15a without  
199 vehicle. Based on histopathological analysis of the tumors in the mouse lungs, compared to  
200 control mice, 5-FU-miR-15a inhibits tumor growth by 58.2% without vehicle ( $p = 0.0066$ ) (**Figure**  
201 **7B**) and by 97.2% (**Figure 7C**) with vehicle ( $p = < 0.0001$ ). This tumor inhibition was enhanced  
202 in the presence of vehicle ( $p = 0.0179$ ) (**Figure 7D**). To assess whether these animals exhibited  
203 any acute toxicity associated with the treatment, their body mass was measured daily during the  
204 treatment period. The body mass of the animals stayed within normal healthy limits (<10%  
205 change in mass) throughout the treatment period (**Figure 7E**) and liver chemistries did not differ  
206 between the treatment groups (**Figure 1**).

207

### 208 **Discussion**



209 In this study, we aimed to design a strategy to develop effective miRNA-based  
210 therapeutics with enhanced efficacy and stability that can potentially subvert the use of delivery  
211 vehicle. One of the key barriers in the development of nucleic acid-based therapeutics is finding  
212 methods to effectively introduce these molecules into cells in a minimally cytotoxic manner.  
213 While there have been some recent successes with using lipid-based nanoparticles as a vehicle  
214 to deliver nucleic-acids in some diseases, toxicities associated with systemic delivery, including  
215 immunotoxicity, still exist.<sup>43-47</sup> The toxicity of delivery vehicle becomes more profound and  
216 prohibitory during dose escalation studies as increasing amount of vehicle are needed to deliver  
217 the respectively increasing nucleic-acid drug candidates. While delivery vehicles may be  
218 relatively safe at low concentrations, this approach relies on an extremely potent biological  
219 response to the nucleic acid drug candidate. This is the case in mRNA vaccines, where a small  
220 amount of mRNA, and thereby its vehicle, is required for an immunological response. However,  
221 in the situation where higher dose of vehicle are needed to pack proportionally larger amounts  
222 of nucleic acids, toxicities will become a major bottleneck for safe and effective therapy. Among  
223 the 14 currently FDA approved oligonucleotide-based therapeutics, only 6 are delivered  
224 systemically. Notably, the use of patisiran (Onpattro) requires premedication consisting of a  
225 corticosteroid, acetaminophen, a H1 blocker, and a H2 blocker to prevent infusion-related  
226 reactions.<sup>25</sup> In this study, we demonstrated an example of toxicities associated with lipid-based  
227 nanoparticles, exhibiting a dose-dependent effect on apoptosis (**Figure 2**).

228 As a result of these observed toxicities, we sought to enable the use of miRNA-based  
229 therapeutics that may be able to get away from the use of large amounts of delivery vehicle or  
230 eliminating their use altogether. In this study, we focused our efforts to demonstrate the broad  
231 potential of miRNA-based therapeutics by enhancing its deliverability. This novel approach was  
232 approached by modified guide strand of tumor suppressor miRNA by replacing the uracils with  
233 5-FUs (**Figure 1**). This approach has minimal alterations of the miRNA molecule, as the single  
234 hydrogen to fluorine substitution at the 5-position of uracil does not interfere with its Watson-

235 Crick base pairing with adenine. By incorporation of 5-FU to miRNA, we were able to deliver the  
236 5-FU modified miRNA mimetics under without use of delivery vehicle *in vitro* (**Figure 3**). These  
237 modifications also enhanced efficacy of native miRNA by combine the therapeutic effects of  
238 miRNA and 5-FU into one entity, as well as creating a more stable molecule against  
239 degradation.<sup>30</sup> We have previously demonstrated in colon cancer, pancreatic, and breast cancer  
240 that 5-FU modification of miRNAs have several key features such as retaining target specificity,  
241 vehicle-free delivery, enhanced potency, and increased intracellular stability.<sup>28,30,31,48</sup> To  
242 demonstrate the general applicability of this approach to other tumor suppressor miRNAs, we  
243 chose 12 well-studied tumor suppressor miRNAs and applied our 5-FU modification strategy.  
244 We screened these 12 different 5-FU-modified miRNA mimetics in several other major cancer  
245 types including breast cancer, gastric cancer, leukemia, lung cancer, and pancreatic cancer.  
246 While it is impractical to screen all potential tumor suppressor miRNAs, the tumor suppressor  
247 miRNAs selected in this study have been previously shown to inhibit cancer growth, disease  
248 progression, metastasis, and/or drug resistance.<sup>38</sup> Their biological roles and their targets are  
249 also defined, well-investigated, and briefly summarized below. As previously stated, miR-15  
250 regulates apoptosis by targeting BCL2. Similarly, miR-129 can also regulate BCL2 expression  
251 and other protumorigenic proteins such as high-motility group box-1 (HMGB-1) and CDK6.<sup>7,49,50</sup>  
252 The let-7 family regulates the RAS oncogene expression and is found to be downregulated in  
253 multiple cancer types.<sup>6,51,52</sup> miR-34 directly targets P53 and thus it has an impact on multiple  
254 pathways including tumor proliferation, apoptosis, and cell cycle.<sup>35,53-57</sup> miR-140 regulates  
255 stemness through some of its targets HDAC4, SOX9, and ALDH1. miR-145 expression is found  
256 to be highly downregulated in colon cancer<sup>9</sup> and regulates cancer growth, in several tumor  
257 types, through its targets that include IGF1R, MYO6, and SP1.<sup>9,41,58-62</sup> miR-194 inhibits  
258 metastasis and invasion by inhibiting BMP1, p27<sup>kip1</sup>, and RBX1.<sup>63-65</sup> The miR-200 family  
259 (including miR-200a/b/c) has been shown to inhibit EMT by downregulating ZEB1 and ZEB2 in  
260 multiple tumor types including breast, gastric, lung, and pancreatic cancer.<sup>8,36,66-69</sup> miR-215 is a

261 cell cycle regulator and delivering miR-215 to cancer cells causes cell cycle arrest in several  
262 cancer types.<sup>11,70,71</sup> Lastly, miR-506 also regulates cancer progression and invasion by targeting  
263 the NF- $\kappa$ B pathway, SNAI1, and YAP1.<sup>33,34,72,73</sup> In summary, these tumor suppressor miRNAs  
264 have diverse and sometimes context-dependent biological functions thus it is important to  
265 screen multiple therapeutic candidates.

266 During this screen, we observed that all 12 5-FU-modified miRNA mimetics were able to  
267 inhibit cancer cell proliferation at a concentration of 50 nM without use of delivery vehicle  
268 (**Figure 3**). Although we noticed that each unique 5-FU modified miRNA mimetic has different  
269 levels of efficacy *in vitro*, interestingly, certain cell lines—AGS gastric cancer cells and REH  
270 leukemia cells—were highly sensitive to all 5-FU-modified-miRNA-mimetic treatment (**Figure 3A**  
271 **&3D**). This raises an interesting finding that for gastric cancer and leukemia, 5-FU-modified  
272 miRNA mimetics are all strong potential therapeutic candidates despite the different targets and  
273 pathways that are impacted by each miRNA. Although we have demonstrated previously that 5-  
274 FU modification of miRNAs (miR-129, miR-15a, miR-489) does not alter target specificity<sup>28-31</sup>, to  
275 further validate that target specificity is maintained with this approach, we selected two  
276 additional miRNAs to investigate further—let-7a and miR-145—as they are previously reported  
277 to be markers of aggression and prognosticators in gastric cancer<sup>41,42,60,74-76</sup> and in lung  
278 cancer<sup>58,59,61,77,78</sup>. Our results demonstrate that 5-FU-let-7a and 5-FU-miR-145 retain target  
279 specificity to CDK6 and SP1 respectively, indicating that there is successful knockdown of their  
280 previously reported target genes (**Figure 6A-6D**). To further validate that 5-FU-modified miRNA  
281 mimetics retain target specificity and can do so under vehicle-free conditions, we investigated  
282 two direct targets of miR-15a, CHK1 and WEE1. Our results demonstrated that 5-FU-miR-15a  
283 can knock down target expression, without delivery vehicle, while neither miR-15a, 5-FU, nor  
284 the combination of two are able to knock down expression (**Figure 6E**). Collectively, our results  
285 demonstrated that 5-FU modification of tumor suppressor miRNAs retain target specificity. We  
286 also observe that 5-FU-let-7a and 5-FU-miR-145 form a FdUMP-TS complex, demonstrating

287 that 5-FU is indeed released, potentially as a breakdown product of these mimetics, and can  
288 exert 5-FU activity in cells (**Figure 5**). Taken together, our results show that 5-FU-modified  
289 miRNA mimetics are potent therapeutic molecules, effective in the nanomolar range and that  
290 they are more effective at inhibiting cancer cell proliferation than unmodified miRNAs.

291 To demonstrate the therapeutic potential of 5-FU modified miRNA mimetics *in vivo*, we  
292 selected 5-FU-miR-15a based on our *in vitro* screening using an immunocompetent syngeneic  
293 mouse colon cancer model. Using a tail vein injection syngeneic colon cancer mouse model,  
294 we observed that 5-FU-miR-15a can inhibit cancer cell growth and lung metastasis both with  
295 and without delivery vehicle (**Figure 7A-7D**). This model was selected as a proof-of-concept to  
296 model efficacy in a metastatic disease setting, the largest burden on cancer morbidity and  
297 mortality. It is worth noting that the therapeutic efficacy of 5-FU-miR-15a can be further  
298 enhanced with a low concentration of a polyethyleneimine LNP delivery vehicle. This is an  
299 expected outcome of this investigation, as we sought to create miRNA-based therapeutics that  
300 relies only on a little to no delivery vehicle, key to avoiding potential toxicities (**Figure 7**). This is  
301 the first time, to our best knowledge, miRNA-based cancer therapeutics have been  
302 demonstrated to be effective without the aid of delivery vehicle *in vivo*. Mice treated with 5-FU-  
303 miR-15a with and without delivery vehicle show no significant weight and hair loss (**Figure 7E**).  
304 Liver chemistries also did not differ between treatment groups, potentially representing a lack of  
305 hepatotoxicity from 5-FU-modified miRNA mimetic treatment (**Figure S1**). Additionally, there  
306 were also no behavioral changes, such as loss of appetite, among the treated mice. The  
307 demonstration of efficacy in the presence and absence of delivery vehicle may allow for  
308 flexibility in the optimization of the formulation of the mimetics for future clinical use, and to  
309 avoid the bottleneck of toxicity. Future therapeutic development can consider the reduction or  
310 elimination of vehicle thus potentially avoiding side effects due to toxicity as seen in systemic  
311 chemotherapeutic regimens. Similarly, low toxicities may give rise to a larger therapeutic

312 window of 5-FU-modified miRNA mimetics and further work must be completed to optimize the  
313 dosage of these mimetics.

314 Previous studies from our group have compared a few different modification strategies of  
315 miRNAs, including varying the number of 5-FU substitutions and locations of the moiety and  
316 have demonstrated that the substitution of all uracil bases on the guide strand appear to be the  
317 most effective.<sup>30</sup> A potential mechanism of action of the observed enhanced efficacy and  
318 deliverability of the 5-FU-modified miRNA mimetics is due to the increased lipophilicity that is  
319 conferred with the addition of fluorine to drug candidates, which is a strategy that has been used  
320 for improving lipophilicity of small molecule compounds.<sup>79,80</sup> This increase in lipophilicity may  
321 allow for the miRNA—negatively charged and typically unable to cross the cell membrane—to  
322 cross the cell membrane. Our approach takes advantage of 5-FU as an active anti-cancer  
323 therapeutic compound and the fluorine group will also enhance the deliverability of a nucleic-  
324 acid based miRNA tumor suppressor. There are various modification strategies in nucleic acid  
325 drug development—especially in antisense oligonucleotides—including 2'-O-methyl that confers  
326 more target affinity and 2'-fluoro that confers more nuclease resistance.<sup>81,82</sup> We have previously  
327 observed that 5-FU modification in miR-129 confers additional intracellular stability<sup>30</sup>, however in  
328 this study, we did not observe an increase in half-life of 5-FU modified miRNA mimetics in cell  
329 culture media supplemented with 10% FBS (data not shown). Notably, we did not make any  
330 additional modifications to attempt to preserve the native miRNA tumor suppressor function.  
331 Future studies can consider some of these approaches to optimize the design of these drug  
332 candidates. It is also difficult to tease apart the individual contributions to the anti-tumor  
333 phenotype of the 5-FU and the tumor suppressor miRNAs that make up the 5-FU-modified  
334 miRNA mimetics. Future studies evaluating 5-FU-modified anti-miRNAs may help begin  
335 answering some of those mechanisms. Similarly, while the 5-FU-modified miRNA mimetics  
336 appear to be broadly effective, the selection of specific 5-FU-modified miRNA mimetics for

337 further pre-clinical development should consider miRNA targets of oncogenic signaling  
338 pathways and the specific cancer type.

339 In summary, our study demonstrates that 5-FU-modified miRNA mimetics display broad  
340 therapeutic potential, as they are effective in several different cancer types without the aid of  
341 transfection vehicle. This study expands on previous work on 5-FU-modified miRNA mimetics,  
342 showing that they are efficacious in additional cancer types including gastric cancer, lung  
343 cancer, and leukemia. Notably, 5-FU-modified miRNA mimetics retain their mRNA target  
344 specificity and appears to be well tolerated in our animal studies. Overall, 5-FU modification of  
345 miRNAs may serve as a novel technology platform for broad miRNA-based therapeutic  
346 development.

347

## 348 **Materials and Methods**

### 349 **Design and synthesis of the 5-FU-modified miRNA mimetics**

350 The 5-FU-modified miRNA mimetics were designed and synthesized by substituting uracil with  
351 5-fluorouracil (5-FU) on the guide strand of the miRNA. The passenger strand was left  
352 unmodified to avoid any potential off-target effects and to preserve miRNA function.  
353 Oligonucleotides with these modifications as well as their corresponding passenger strand were  
354 purchased from Dharmacon (Horizon Discovery). Both strands of oligonucleotides were HPLC  
355 purified. The guide strands and passenger strands were then annealed prior to use.

356

### 357 **Cell culture**

358 All cell lines were obtained from ATCC and are derived from human cells. AGS gastric cancer  
359 and A549 lung cancer cells were cultured in Ham's F-12K (Kaighn's) Medium supplemented  
360 with 10% fetal bovine serum (FBS). SKBR3 breast cancer cells and HCT116 colon cancer cells  
361 were cultured in McCoy's 5A Medium supplemented with 10% FBS. REH leukemia cells and  
362 AsPC-1 pancreatic cancer cells were cultured in RPMI-1640 Medium supplemented with 10%

363 FBS. Hs766T and PANC-1 pancreatic cancer cells were cultured in Dulbecco's Modified Eagle  
364 Medium (DMEM) supplemented with 10% FBS.

365

### 366 **Western immunoblot analysis**

367 AGS, A549, and HCT116 cells were seeded onto 6-well plates at a cell density of 100,000 cells  
368 per well. 24 hours later, the cells were transfected with 50 nM of miRNA under vehicle-free  
369 conditions. HCT116 cells were also treated with a 50 nM miR-15a control condiditon, a 350 nM  
370 of 5-FU (equivalent 5-FU concentration in the 5-FU modified miRNA), and the combination of  
371 the two. 72 hours later, cells were lysed with RIPA buffer and the protein samples were used for  
372 western immunoblotting. Proteins were probed with anti-thymidylate synthase antibody  
373 (Millipore, Cat:MAB4130 , 1:500), anti-CDK6 antibody (Cell Signalling, Cat:13331, 1:10,000),  
374 anti-SP1 antibody (Abcam, Cat:ab124804, 1:10,000),  $\beta$ -actin antibody (Invitrogen, Cat:A5441,  
375 1:10,000,000), anti-CHK1 antibody (Cell Signalling, Cat: ,1:1000), anti-WEE1 antibody (Cell  
376 Signalling, Cat: , 1:1000), and anti-GAPDH antibody (Santa Cruz, Cat:, 1:100,000). Protein  
377 bands were visualized using a LI-COR Biosciences Odyssey FC imaging system after the  
378 addition of SuperSignal West Pico chemiluminescent substrate (Thermo Fisher Scientific).  
379 Proteins were quantified with Image Studio Version 5.2.4 (LI-COR Biosciences). For the 5-FU  
380 condition of the thymidylate synthase blot, AGS cells were treated with 1  $\mu$ M of 5-FU and A549  
381 cells were treated with 3  $\mu$ M of 5-FU.

382

### 383 **Apoptosis assay**

384 AGS and A549 cells were treated with a polyethyleneimine-based lipid nanoparticle (*in vivo*-  
385 jetPEI®, Polyplus). 48 hours later, the cells were stained with Annexin V (Thermo Fisher  
386 Scientific) and apoptotic cells were quantified by flow cytometric analysis.

387

### 388 **Cell proliferation assay**

389 For vehicle-free miRNA treatment, cells were seeded onto 96 well plates at 1000 cells per well.  
390 24 hours after seeding, 5-FU-modified miRNA mimetics were added to the cells. These cells  
391 were incubated for 24 hours and then the media was changed to fresh media supplemented  
392 with 10% dialyzed FBS. For miRNA treatment with vehicle, cells were seeded onto 6 well plates  
393 at 100,000 cells per well. MiRNAs were combined with Oligofectamine™ (Thermo Fisher  
394 Scientific) and then added to the cells. 24 hours later, the cells were trypsinized and re-seeded  
395 onto a 96 well plate at 1000 cells per well. Cell viability was measured 6 days post transfection  
396 using WST-1 reagent (Roche). Cells were incubated with 10 µl of WST-1 per 100 µl of media for  
397 1 hour and absorbance was read at 450 and 630 nm. The O.D. was calculated by subtracting  
398 the absorbance at 630 nm from that at 450 nm and the relative proliferation was calculated by  
399 normalizing the O.D. to negative control.

400

#### 401 **Syngeneic mouse model**

402 8-week-old female BALB/cJ mice (Jackson Labs 000651) were inoculated with  $5 \times 10^5$  CT-26  
403 syngeneic colon cancer cells suspended in 0.1 mL of PBS via tail vein injection. Five days post  
404 inoculation, mice were treated with either 9.6 µM of vehicle alone (*in vivo*-jetPEI®, Polyplus), 5-  
405 FU-miR-15a miRNA (40 µg) with vehicle, or 5-FU-miR-15a (40 µg) without vehicle on  
406 alternating days for a total of 8 doses, with 5 mice per treatment group. Vehicle concentrations  
407 were selected in a non-toxic range as per manufacturer recommendations. All treatments were  
408 diluted in 5% glucose to a final volume of 0.1 mL and given via tail vein injection. Mouse tumors  
409 were harvested from the lungs at the day 20 endpoint of the study and tumors were formalin  
410 fixed, paraffin embedded, and mounted onto slides for staining with H&E. Slides were assessed  
411 by a board certified pathologist and scored for % tumor content. Blood was also harvested at  
412 the endpoint and was sent to a clinical chemistry lab for subsequent liver enzyme analysis.

413

#### 414 **Statistical analysis**



415 The quantitative data were presented as mean value  $\pm$  standard error of the mean of at least 3  
416 independent experiments in all in vitro studies. Data were analyzed by two-tailed Student's t-  
417 test. The results of the animal studies presented as mean value  $\pm$  standard deviation. A p value  
418 of less than 0.05 were considered to be statistically significant ( $*p < 0.05$ ,  $**p < 0.01$ ,  $***p <$   
419  $0.001$ ,  $****p < 0.0001$ ).

420

## 421 **Acknowledgements**

422 We would like to thank Matthew Godwin and Zachary Ye for their support in this project. This  
423 study was supported by NIH/NCI R01CA197098-01 (J. Ju), Curamir Therapeutics Inc. (J. Ju),  
424 and VA Merit Award BX005260-01 (J. Ju).

425

## 426 **Conflicts of Interest**

427 A.F. and J.J. have filed a patent for 5-FU-modified miRNA mimetics. J.J. is a scientific co-  
428 founder of Curamir Therapeutics. The remaining authors declare no competing interests.

429

## 430 **Author Contributions**

431 Conceptualization, J.G.Y., A.F., and J.J.; Methodology, J.G.Y. and J.J.; Investigation, J.G.Y, A.F.,  
432 G.H; Writing – Original Draft, J.G.Y. and J.J.; Writing Reviewing & Editing, J.G.Y., A.F., G.H.,  
433 and J.J.; Supervision J.J., Project Administration, L.C., J.J.; Funding Acquisition, J.J.

434

## 435 **References**

- 436 1. Lee, R.C., Feinbaum, R.L., and Ambros, V. (1993). The *C. elegans* heterochronic gene  
437 *lin-4* encodes small RNAs with antisense complementarity to *lin-14*. *cell* 75, 843-854.
- 438 2. Wightman, B., Ha, I., and Ruvkun, G. (1993). Posttranscriptional regulation of the  
439 heterochronic gene *lin-14* by *lin-4* mediates temporal pattern formation in *C. elegans*.  
440 *Cell* 75, 855-862.
- 441 3. Esquela-Kerscher, A., and Slack, F.J. (2006). Oncomirs—microRNAs with a role in  
442 cancer. *Nature reviews cancer* 6, 259-269.
- 443 4. Calin, G.A., Dumitru, C.D., Shimizu, M., Bichi, R., Zupo, S., Noch, E., Aldler, H., Rattan,  
444 S., Keating, M., and Rai, K. (2002). Frequent deletions and down-regulation of micro-

- 445 RNA genes miR15 and miR16 at 13q14 in chronic lymphocytic leukemia. *Proceedings of*  
446 *the national academy of sciences* 99, 15524-15529.
- 447 5. Cimmino, A., Calin, G.A., Fabbri, M., Iorio, M.V., Ferracin, M., Shimizu, M., Wojcik, S.E.,  
448 Aqeilan, R.I., Zupo, S., and Dono, M. (2005). miR-15 and miR-16 induce apoptosis by  
449 targeting BCL2. *Proceedings of the National Academy of Sciences* 102, 13944-13949.
- 450 6. Johnson, C.D., Esquela-Kerscher, A., Stefani, G., Byrom, M., Kelnar, K., Ovcharenko, D.,  
451 Wilson, M., Wang, X., Shelton, J., Shingara, J., Chin, L., et al. (2007). The let-7  
452 microRNA represses cell proliferation pathways in human cells. *Cancer Res* 67, 7713-  
453 7722. 10.1158/0008-5472.CAN-07-1083.
- 454 7. Karaayvaz, M., Zhai, H., and Ju, J. (2013). miR-129 promotes apoptosis and enhances  
455 chemosensitivity to 5-fluorouracil in colorectal cancer. *Cell Death Dis* 4, e659.  
456 10.1038/cddis.2013.193.
- 457 8. Roybal, J.D., Zang, Y., Ahn, Y.H., Yang, Y., Gibbons, D.L., Baird, B.N., Alvarez, C.,  
458 Thilaganathan, N., Liu, D.D., Saintigny, P., Heymach, J.V., et al. (2011). miR-200 Inhibits  
459 lung adenocarcinoma cell invasion and metastasis by targeting Flt1/VEGFR1. *Mol*  
460 *Cancer Res* 9, 25-35. 10.1158/1541-7786.MCR-10-0497.
- 461 9. Slaby, O., Svoboda, M., Fabian, P., Smerdova, T., Knoflickova, D., Bednarikova, M.,  
462 Nenutil, R., and Vyzula, R. (2007). Altered expression of miR-21, miR-31, miR-143 and  
463 miR-145 is related to clinicopathologic features of colorectal cancer. *Oncology* 72, 397-  
464 402. 10.1159/000113489.
- 465 10. Song, B., Wang, Y., Kudo, K., Gavin, E.J., Xi, Y., and Ju, J. (2008). miR-192 Regulates  
466 dihydrofolate reductase and cellular proliferation through the p53-microRNA circuit. *Clin*  
467 *Cancer Res* 14, 8080-8086. 10.1158/1078-0432.CCR-08-1422.
- 468 11. Song, B., Wang, Y., Titmus, M.A., Botchkina, G., Formentini, A., Kornmann, M., and Ju,  
469 J. (2010). Molecular mechanism of chemoresistance by miR-215 in osteosarcoma and  
470 colon cancer cells. *Mol Cancer* 9, 96. 10.1186/1476-4598-9-96.
- 471 12. Xi, Y., Shalgi, R., Fodstad, O., Pilpel, Y., and Ju, J. (2006). Differentially regulated micro-  
472 RNAs and actively translated messenger RNA transcripts by tumor suppressor p53 in  
473 colon cancer. *Clin Cancer Res* 12, 2014-2024. 10.1158/1078-0432.CCR-05-1853.
- 474 13. Zhai, H., Song, B., Xu, X., Zhu, W., and Ju, J. (2013). Inhibition of autophagy and tumor  
475 growth in colon cancer by miR-502. *Oncogene* 32, 1570-1579. 10.1038/onc.2012.167.
- 476 14. Ganju, A., Khan, S., Hafeez, B.B., Behrman, S.W., Yallapu, M.M., Chauhan, S.C., and  
477 Jaggi, M. (2017). miRNA nanotherapeutics for cancer. *Drug Discov Today* 22, 424-432.  
478 10.1016/j.drudis.2016.10.014.
- 479 15. Zhang, Y., Wang, Z., and Gemeinhart, R.A. (2013). Progress in microRNA delivery.  
480 *Journal of controlled release* 172, 962-974.
- 481 16. Kedmi, R., Ben-Arie, N., and Peer, D. (2010). The systemic toxicity of positively charged  
482 lipid nanoparticles and the role of Toll-like receptor 4 in immune activation. *Biomaterials*  
483 31, 6867-6875.
- 484 17. Wang, T., Larcher, L.M., Ma, L., and Veedu, R.N. (2018). Systematic screening of  
485 commonly used commercial transfection reagents towards efficient transfection of  
486 single-stranded oligonucleotides. *Molecules* 23, 2564.
- 487 18. Verhoef, J.J., Carpenter, J.F., Anchordoquy, T.J., and Schellekens, H. (2014). Potential  
488 induction of anti-PEG antibodies and complement activation toward PEGylated  
489 therapeutics. *Drug discovery today* 19, 1945-1952.
- 490 19. Yang, Q., and Lai, S.K. (2015). Anti-PEG immunity: emergence, characteristics, and  
491 unaddressed questions. *Wiley Interdisciplinary Reviews: Nanomedicine and*  
492 *Nanobiotechnology* 7, 655-677.
- 493 20. Zhang, P., Sun, F., Liu, S., and Jiang, S. (2016). Anti-PEG antibodies in the clinic:  
494 Current issues and beyond PEGylation. *Journal of Controlled Release* 244, 184-193.

- 495 21. Ganson, N.J., Povsic, T.J., Sullenger, B.A., Alexander, J.H., Zelenkofske, S.L., Sailstad,  
496 J.M., Rusconi, C.P., and Hershfield, M.S. (2016). Pre-existing anti-polyethylene glycol  
497 antibody linked to first-exposure allergic reactions to pegnivacogin, a PEGylated RNA  
498 aptamer. *Journal of Allergy and Clinical Immunology* 137, 1610-1613. e1617.
- 499 22. Koropatnick, T.A., Engle, J.T., Apicella, M.A., Stabb, E.V., Goldman, W.E., and McFall-  
500 Ngai, M.J. (2004). Microbial factor-mediated development in a host-bacterial mutualism.  
501 *Science* 306, 1186-1188.
- 502 23. Allen, T.M., and Cullis, P.R. (2013). Liposomal drug delivery systems: from concept to  
503 clinical applications. *Advanced drug delivery reviews* 65, 36-48.
- 504 24. Kafil, V., and Omid, Y. (2011). Cytotoxic impacts of linear and branched  
505 polyethylenimine nanostructures in a431 cells. *BiolImpacts: BI* 1, 23.
- 506 25. Adams, D., Gonzalez-Duarte, A., O'Riordan, W.D., Yang, C.-C., Ueda, M., Kristen, A.V.,  
507 Tournev, I., Schmidt, H.H., Coelho, T., and Berk, J.L. (2018). Patisiran, an RNAi  
508 therapeutic, for hereditary transthyretin amyloidosis. *New england journal of medicine*  
509 379, 11-21.
- 510 26. Khvorova, A., and Watts, J.K. (2017). The chemical evolution of oligonucleotide  
511 therapies of clinical utility. *Nature biotechnology* 35, 238-248.
- 512 27. Santi, D.V., McHenry, C.S., and Sommer, H. (1974). Mechanism of interaction of  
513 thymidylate synthetase with 5-fluorodeoxyuridylate. *Biochemistry* 13, 471-481.
- 514 28. Fesler, A., Liu, H., and Ju, J. (2018). Modified miR-15a has therapeutic potential for  
515 improving treatment of advanced stage colorectal cancer through inhibition of BCL2,  
516 BMI1, YAP1 and DCLK1. *Oncotarget* 9, 2367.
- 517 29. Guo, S., Fesler, A., Huang, W., Wang, Y., Yang, J., Wang, X., Zheng, Y., Hwang, G.-R.,  
518 Wang, H., and Ju, J. (2020). Functional Significance and Therapeutic Potential of miR-  
519 15a Mimic in Pancreatic Ductal Adenocarcinoma. *Mol Ther Nucleic Acids* 19, 228-239.  
520 10.1016/j.omtn.2019.11.010.
- 521 30. Wu, N., Fesler, A., Liu, H., and Ju, J. (2018). Development of novel miR-129 mimics with  
522 enhanced efficacy to eliminate chemoresistant colon cancer stem cells. *Oncotarget* 9,  
523 8887.
- 524 31. Soung, Y.H., Chung, H., Yan, C., Fesler, A., Kim, H., Oh, E.S., Ju, J., and Chung, J.  
525 (2020). Therapeutic Potential of Chemically Modified miR-489 in Triple-Negative Breast  
526 Cancers. *Cancers (Basel)* 12. 10.3390/cancers12082209.
- 527 32. Zhai, H., Fesler, A., Ba, Y., Wu, S., and Ju, J. (2015). Inhibition of colorectal cancer stem  
528 cell survival and invasive potential by hsa-miR-140-5p mediated suppression of Smad2  
529 and autophagy. *Oncotarget* 6, 19735-19746. 10.18632/oncotarget.3771.
- 530 33. Chen, N., Meng, Z., Song, J., Kong, L., Zhang, Y., Guo, S., Zhang, X., Lu, X., Jiang, L.,  
531 Chen, R., Jiao, Z., et al. (2021). miR-506 in patients with chronic myeloid leukemia and  
532 its effect on apoptosis of K562 cells. *Am J Transl Res* 13, 9413-9420.
- 533 34. Li, J., Wu, H., Li, W., Yin, L., Guo, S., Xu, X., Ouyang, Y., Zhao, Z., Liu, S., Tian, Y., Tian,  
534 Z., et al. (2016). Downregulated miR-506 expression facilitates pancreatic cancer  
535 progression and chemoresistance via SPHK1/Akt/NF-kappaB signaling. *Oncogene* 35,  
536 5501-5514. 10.1038/onc.2016.90.
- 537 35. Okada, N., Lin, C.P., Ribeiro, M.C., Biton, A., Lai, G., He, X., Bu, P., Vogel, H., Jablons,  
538 D.M., Keller, A.C., Wilkinson, J.E., et al. (2014). A positive feedback between p53 and  
539 miR-34 miRNAs mediates tumor suppression. *Genes Dev* 28, 438-450.  
540 10.1101/gad.233585.113.
- 541 36. Korpai, M., and Kang, Y. (2008). The emerging role of miR-200 family of microRNAs in  
542 epithelial-mesenchymal transition and cancer metastasis. *RNA Biol* 5, 115-119.  
543 10.4161/rna.5.3.6558.

- 544 37. Fesler, A., Zhai, H., and Ju, J. (2014). miR-129 as a novel therapeutic target and  
545 biomarker in gastrointestinal cancer. *Onco Targets Ther* 7, 1481-1485.  
546 10.2147/OTT.S65548.
- 547 38. Peng, Y., and Croce, C.M. (2016). The role of MicroRNAs in human cancer. *Signal*  
548 *transduction and targeted therapy* 1, 1-9.
- 549 39. Li, J.-P., Liao, X.-H., Xiang, Y., Yao, A., Song, R.-H., Zhang, Z.-J., Huang, F., Dai, Z.-T.,  
550 and Zhang, T.-C. (2018). Hyperoside and let-7a-5p synergistically inhibits lung cancer  
551 cell proliferation via inducing G1/S phase arrest. *Gene* 679, 232-240.
- 552 40. Zhang, Z., Huang, L., Yu, Z., Chen, X., Yang, D., Zhan, P., Dai, M., Huang, S., Han, Z.,  
553 and Cao, K. (2014). Let-7a functions as a tumor suppressor in Ewing's sarcoma cell  
554 lines partly by targeting cyclin-dependent kinase 6. *DNA and cell biology* 33, 136-147.
- 555 41. Qiu, T., Zhou, X., Wang, J., Du, Y., Xu, J., Huang, Z., Zhu, W., Shu, Y., and Liu, P.  
556 (2014). MiR-145, miR-133a and miR-133b inhibit proliferation, migration, invasion and  
557 cell cycle progression via targeting transcription factor Sp1 in gastric cancer. *FEBS*  
558 *letters* 588, 1168-1177.
- 559 42. Zhang, Z., Wang, C., Zhang, Y., Yu, S., Zhao, G., and Xu, J. (2020). CircDUSP16  
560 promotes the tumorigenesis and invasion of gastric cancer by sponging miR-145-5p.  
561 *Gastric Cancer* 23, 437-448.
- 562 43. Hou, X., Zaks, T., Langer, R., and Dong, Y. (2021). Lipid nanoparticles for mRNA  
563 delivery. *Nature Reviews Materials* 6, 1078-1094.
- 564 44. Akinc, A., Maier, M.A., Manoharan, M., Fitzgerald, K., Jayaraman, M., Barros, S., Ansell,  
565 S., Du, X., Hope, M.J., and Madden, T.D. (2019). The Onpatro story and the clinical  
566 translation of nanomedicines containing nucleic acid-based drugs. *Nature*  
567 *nanotechnology* 14, 1084-1087.
- 568 45. Tenchov, R., Bird, R., Curtze, A.E., and Zhou, Q. (2021). Lipid Nanoparticles— From  
569 Liposomes to mRNA Vaccine Delivery, a Landscape of Research Diversity and  
570 Advancement. *ACS nano* 15, 16982-17015.
- 571 46. Lv, H., Zhang, S., Wang, B., Cui, S., and Yan, J. (2006). Toxicity of cationic lipids and  
572 cationic polymers in gene delivery. *Journal of controlled release* 114, 100-109.
- 573 47. Broering, R., Real, C.I., John, M.J., Jahn-Hofmann, K., Ickenstein, L.M., Kleinehr, K.,  
574 Paul, A., Gibbert, K., Dittmer, U., and Gerken, G. (2014). Chemical modifications on  
575 siRNAs avoid Toll-like-receptor-mediated activation of the hepatic immune system in  
576 vivo and in vitro. *International immunology* 26, 35-46.
- 577 48. Guo, S., Fesler, A., Huang, W., Wang, Y., Yang, J., Wang, X., Zheng, Y., Hwang, G.-R.,  
578 Wang, H., and Ju, J. (2019). Functional significance and therapeutic potential of miR-  
579 15a mimic in pancreatic ductal adenocarcinoma. *Molecular Therapy-Nucleic Acids*.
- 580 49. Wu, J., Qian, J., Li, C., Kwok, L., Cheng, F., Liu, P., Perdomo, C., Kotton, D., Vaziri, C.,  
581 and Anderlind, C. (2010). miR-129 regulates cell proliferation by downregulating Cdk6  
582 expression. *Cell cycle* 9, 1809-1818.
- 583 50. Wu, Q., Meng, W.Y., Jie, Y., and Zhao, H. (2018). LncRNA MALAT1 induces colon  
584 cancer development by regulating miR-129-5p/HMGB1 axis. *Journal of cellular*  
585 *physiology* 233, 6750-6757.
- 586 51. Johnson, S.M., Grosshans, H., Shingara, J., Byrom, M., Jarvis, R., Cheng, A., Labourier,  
587 E., Reinert, K.L., Brown, D., and Slack, F.J. (2005). RAS is regulated by the let-7  
588 microRNA family. *Cell* 120, 635-647.
- 589 52. Yu, F., Yao, H., Zhu, P., Zhang, X., Pan, Q., Gong, C., Huang, Y., Hu, X., Su, F., and  
590 Lieberman, J. (2007). let-7 regulates self renewal and tumorigenicity of breast cancer  
591 cells. *Cell* 131, 1109-1123.
- 592 53. Ji, Q., Hao, X., Zhang, M., Tang, W., Yang, M., Li, L., Xiang, D., DeSano, J.T., Bommer,  
593 G.T., and Fan, D. (2009). MicroRNA miR-34 inhibits human pancreatic cancer tumor-  
594 initiating cells. *PloS one* 4, e6816.

- 595 54. Chang, T.-C., Wentzel, E.A., Kent, O.A., Ramachandran, K., Mullendore, M., Lee, K.H.,  
596 Feldmann, G., Yamakuchi, M., Ferlito, M., and Lowenstein, C.J. (2007). Transactivation  
597 of miR-34a by p53 broadly influences gene expression and promotes apoptosis.  
598 *Molecular cell* 26, 745-752.
- 599 55. Raver-Shapira, N., Marciano, E., Meiri, E., Spector, Y., Rosenfeld, N., Moskovits, N.,  
600 Bentwich, Z., and Oren, M. (2007). Transcriptional activation of miR-34a contributes to  
601 p53-mediated apoptosis. *Molecular cell* 26, 731-743.
- 602 56. Rupaimoole, R., and Slack, F.J. (2017). MicroRNA therapeutics: towards a new era for  
603 the management of cancer and other diseases. *Nat Rev Drug Discov* 16, 203-222.  
604 10.1038/nrd.2016.246.
- 605 57. Tarasov, V., Jung, P., Verdoodt, B., Lodygin, D., Epanchintsev, A., Menssen, A., Meister,  
606 G., and Hermeking, H. (2007). Differential regulation of microRNAs by p53 revealed by  
607 massively parallel sequencing: miR-34a is a p53 target that induces apoptosis and G1-  
608 arrest. *Cell cycle* 6, 1586-1593.
- 609 58. Cho, W.C., Chow, A.S., and Au, J.S. (2009). Restoration of tumour suppressor hsa-miR-  
610 145 inhibits cancer cell growth in lung adenocarcinoma patients with epidermal growth  
611 factor receptor mutation. *European journal of cancer* 45, 2197-2206.
- 612 59. Cho, W.C., Chow, A.S., and Au, J.S. (2011). MiR-145 inhibits cell proliferation of human  
613 lung adenocarcinoma by targeting EGFR and NUDT1. *RNA biology* 8, 125-131.
- 614 60. Lei, C., Du, F., Sun, L., Li, T., Li, T., Min, Y., Nie, A., Wang, X., Geng, L., and Lu, Y.  
615 (2017). miR-143 and miR-145 inhibit gastric cancer cell migration and metastasis by  
616 suppressing MYO6. *Cell death & disease* 8, e3101-e3101.
- 617 61. Shen, H., Shen, J., Wang, L., Shi, Z., Wang, M., Jiang, B.-h., and Shu, Y. (2015). Low  
618 miR-145 expression level is associated with poor pathological differentiation and poor  
619 prognosis in non-small cell lung cancer. *Biomedicine & Pharmacotherapy* 69, 301-305.
- 620 62. Su, J., Liang, H., Yao, W., Wang, N., Zhang, S., Yan, X., Feng, H., Pang, W., Wang, Y.,  
621 and Wang, X. (2014). MiR-143 and MiR-145 regulate IGF1R to suppress cell  
622 proliferation in colorectal cancer. *PLoS one* 9, e114420.
- 623 63. Chen, X., Wang, Y., Zang, W., Du, Y., Li, M., and Zhao, G. (2015). miR-194 targets  
624 RBX1 gene to modulate proliferation and migration of gastric cancer cells. *Tumor*  
625 *Biology* 36, 2393-2401.
- 626 64. Ran, R.Z., Chen, J., Cui, L.J., Lin, X.L., Fan, M.M., Cong, Z.Z., Zhang, H., Tan, W.F.,  
627 Zhang, G.Q., and Zhang, Y.J. (2019). miR-194 inhibits liver cancer stem cell expansion  
628 by regulating RAC1 pathway. *Exp Cell Res* 378, 66-75. 10.1016/j.yexcr.2019.03.007.
- 629 65. Song, Y., Zhao, F., Wang, Z., Liu, Z., Chiang, Y., Xu, Y., Gao, P., and Xu, H. (2012).  
630 Inverse association between miR-194 expression and tumor invasion in gastric cancer.  
631 *Annals of surgical oncology* 19, 509-517.
- 632 66. Gregory, P.A., Bert, A.G., Paterson, E.L., Barry, S.C., Tsykin, A., Farshid, G., Vadas,  
633 M.A., Khew-Goodall, Y., and Goodall, G.J. (2008). The miR-200 family and miR-205  
634 regulate epithelial to mesenchymal transition by targeting ZEB1 and SIP1. *Nature cell*  
635 *biology* 10, 593-601.
- 636 67. Korpel, M., Lee, E.S., Hu, G., and Kang, Y. (2008). The miR-200 family inhibits  
637 epithelial-mesenchymal transition and cancer cell migration by direct targeting of E-  
638 cadherin transcriptional repressors ZEB1 and ZEB2. *Journal of Biological Chemistry* 283,  
639 14910-14914.
- 640 68. Lu, Y., Lu, J., Li, X., Zhu, H., Fan, X., Zhu, S., Wang, Y., Guo, Q., Wang, L., and Huang,  
641 Y. (2014). MiR-200a inhibits epithelial-mesenchymal transition of pancreatic cancer stem  
642 cell. *BMC cancer* 14, 85.
- 643 69. Qian, L., Liu, F., Chu, Y., Zhai, Q., Wei, X., Shao, J., Li, R., Xu, Q., Yu, L., Liu, B., and  
644 Liu, Q. (2020). MicroRNA-200c Nanoparticles Sensitized Gastric Cancer Cells to

- 645 Radiotherapy by Regulating PD-L1 Expression and EMT. *Cancer Manag Res* 12, 12215-  
646 12223. 10.2147/CMAR.S279978.
- 647 70. Boni, V., Bitarte, N., Cristobal, I., Zarate, R., Rodriguez, J., Maiello, E., Garcia-Foncillas,  
648 J., and Bandres, E. (2010). miR-192/miR-215 influence 5-fluorouracil resistance through  
649 cell cycle-mediated mechanisms complementary to its post-transcriptional thymidilate  
650 synthase regulation. *Molecular cancer therapeutics* 9, 2265-2275.
- 651 71. Deng, Y., Huang, Z., Xu, Y., Jin, J., Zhuo, W., Zhang, C., Zhang, X., Shen, M., Yan, X.,  
652 and Wang, L. (2014). MiR-215 modulates gastric cancer cell proliferation by targeting  
653 RB1. *Cancer letters* 342, 27-35.
- 654 72. Arora, H., Qureshi, R., and Park, W.-Y. (2013). miR-506 regulates epithelial  
655 mesenchymal transition in breast cancer cell lines. *PloS one* 8, e64273.
- 656 73. Zhang, Y., Lin, C., Liao, G., Liu, S., Ding, J., Tang, F., Wang, Z., Liang, X., Li, B., and  
657 Wei, Y. (2015). MicroRNA-506 suppresses tumor proliferation and metastasis in colon  
658 cancer by directly targeting the oncogene EZH2. *Oncotarget* 6, 32586.
- 659 74. Zhou, T., Chen, S., and Mao, X. (2019). miR-145-5p affects the differentiation of gastric  
660 cancer by targeting KLF5 directly. *Journal of cellular physiology* 234, 7634-7644.
- 661 75. Tang, R., Yang, C., Ma, X., Wang, Y., Luo, D., Huang, C., Xu, Z., Liu, P., and Yang, L.  
662 (2016). MiR-let-7a inhibits cell proliferation, migration, and invasion by down-regulating  
663 PKM2 in gastric cancer. *Oncotarget* 7, 5972.
- 664 76. Yang, Q., Jie, Z., Cao, H., Greenlee, A.R., Yang, C., Zou, F., and Jiang, Y. (2011). Low-  
665 level expression of let-7a in gastric cancer and its involvement in tumorigenesis by  
666 targeting RAB40C. *Carcinogenesis* 32, 713-722.
- 667 77. Blower, P.E., Chung, J.H., Verducci, J.S., Lin, S., Park, J.K., Dai, Z., Liu, C.G.,  
668 Schmittgen, T.D., Reinhold, W.C., Croce, C.M., Weinstein, J.N., et al. (2008).  
669 MicroRNAs modulate the chemosensitivity of tumor cells. *Mol Cancer Ther* 7, 1-9.  
670 10.1158/1535-7163.MCT-07-0573.
- 671 78. Duan, S., Yu, S., Yuan, T., Yao, S., and Zhang, L. (2019). Exogenous let-7a-5p induces  
672 A549 lung cancer cell death through BCL2L1-mediated PI3K $\gamma$  signaling pathway.  
673 *Frontiers in oncology* 9, 808.
- 674 79. Böhm, H.J., Banner, D., Bendels, S., Kansy, M., Kuhn, B., Müller, K., Obst-Sander, U.,  
675 and Stahl, M. (2004). Fluorine in medicinal chemistry. *ChemBioChem* 5, 637-643.
- 676 80. Purser, S., Moore, P.R., Swallow, S., and Gouverneur, V. (2008). Fluorine in medicinal  
677 chemistry. *Chemical Society Reviews* 37, 320-330.
- 678 81. Shen, W., Liang, X.-h., Sun, H., and Crooke, S.T. (2015). 2'-Fluoro-modified  
679 phosphorothioate oligonucleotide can cause rapid degradation of P54nrb and PSF.  
680 *Nucleic acids research* 43, 4569-4578.
- 681 82. Yoo, B.H., Bochkareva, E., Bochkarev, A., Mou, T.C., and Gray, D.M. (2004).  
682 2'-O-methyl-modified phosphorothioate antisense oligonucleotides have reduced  
683 non-specific effects in vitro. *Nucleic acids research* 32, 2008-2016.

684

685

686

687

688

689

690 **Figure Legends**

691 **Figure 1. Panel of 5-fluorouracil-modified miRNAs.** The sequences of twelve tumor  
692 suppressor miRNAs—let-7a, miR-15a, miR-34, miR-129, miR-140, miR-145, miR-194, miR-125,  
693 miR-200a/b/c, and miR-506—with their uracil bases of the 5' strand of the mature miRNA  
694 substituted with the antimetabolite nucleoside analog 5-fluorouracil (5-FU).

695  
696 **Figure 2. Nucleic acid delivery vehicles are inherently toxic.** Common cationic lipid-based  
697 nucleic acid delivery vehicles such as polyethyleneimine (PEI) are toxic to cells. **(A)** AGS and  
698 **(B)** A549 cells exhibit dose-dependent apoptosis in the presence of PEI.

699  
700 **Figure 3. Vehicle-free treatment of 5-FU-modified miRNAs exhibit potent inhibition of**  
701 **tumor cell proliferation.** A panel of twelve 5-FU-modified miRNA mimetics were screened for  
702 their effectiveness at inhibiting cell viability compared to negative control (scramble) miRNA at  
703 50 nM without delivery vehicle. Several types of cancer cell lines were screened: **(A)** AGS  
704 gastric cancer cells, **(B)** A549 lung cancer cells, **(C)** SBKR3 breast cancer cells, **(D)** REH  
705 leukemia cells, and **(E)** AsPC-1, **(F)** Hs766T, and **(G)** PANC-1 pancreatic cancer cells.

706  
707 **Figure 4. 5-FU-modification enhances the tumor suppressor effect of miRNAs and 5-FU-**  
708 **modified miRNA mimetics can enter cells without delivery vehicle.** 5-FU-modified miR-145  
709 (5-FU-miR-145) and 5-FU-modified let-7a (5-FU-let7a) inhibits cell proliferation both with and  
710 without delivery vehicle in AGS gastric cancer cell line **(A-D)** and in A549 non-small cell lung  
711 cancer cell line **(E-H)**. Notably, 5-FU-modified miRNA mimetics appear to be able enter the cell  
712 and inhibit cell growth, while unmodified miR-145 and let-7a are only able to inhibit tumor growth  
713 in the presence of delivery vehicle. Data are presented as mean  $\pm$  standard error of the mean  
714 and analyzed by Student's t-test (n = 3).

715

716 **Figure 5. 5-FU-let-7a and 5-FU-mi5-145 exhibits 5-FU activity.** (A) 5-FU-let-7a and (B) 5-FU-  
717 miR-145 forms a TS-FdUMP ternary complex in AGS gastric cancer cells and A549 lung cancer  
718 cells as seen by a band shift upon Western blot of TS. All cells were treated with 50nM of  
719 miRNA and the 1 $\mu$ M of 5-FU in AGS cells and 3 $\mu$ M of 5-FU in A549 cells.

720

721 **Figure 6. 5-FU-modified miRNA mimetics retain target specificity.** CDK6 is a known target  
722 of let-7a and 5-FU-let-7a can knockdown CDK6 expression in both (A) AGS gastric cancer cells  
723 and (B) A549 lung cancer cells. SP1 is a known target of miR-145 and 5-FU-miR-145 knocks  
724 down SP1 expression in both (C) AGS gastric cancer cells and (D) A549 lung cancer cells  
725 under vehicle-free conditions. All cells were treated with 50 nM of either control scramble  
726 miRNA or the respective miRNA. (E) 5-FU-miR-15a knocks down expression of its targets,  
727 CHK1 and WEE1, under vehicle free conditions, whereas miR-15a, 5-FU, or the combination of  
728 the two does not in HCT116 colon cancer cells. Data are presented as mean  $\pm$  standard error of  
729 the mean and analyzed by Student's t-test (n = 3). \* $p < 0.05$ , \*\* $p < 0.01$ , \*\*\* $p < 0.001$ .

730

731 **Figure 7. 5-FU-miR-15a inhibits tumor growth in an *in vivo* syngeneic colorectal cancer**  
732 **mouse model with and without delivery vehicle.** CT-26 tumor allografts established in 8-  
733 week-old female BALB/cJ mice via tail vein injection following treatment (40  $\mu$ g q.o.d., 8 doses).  
734 (a-c) Representative histological sections of tumors harvested after 20 days and stained with  
735 H&E. (d) 5-FU-miR-15a inhibits tumor growth with and without PEI, though the efficacy is  
736 improved with delivery vehicle ( $p = 0.0179$ ). (e) Body weight change was measured as an  
737 indicator acute toxicity and no toxicity was observed (< 10% weight loss). Data are presented as  
738 mean  $\pm$  standard deviation and analyzed by Student's t-test (n = 5). \* $p < 0.05$ , \*\* $p < 0.01$ , \*\*\*\* $p$   
739 < 0.0001.

740

741



742

| <b>Condition</b>   | <b>IC<sub>50</sub> (nM)</b> |
|--------------------|-----------------------------|
| <b>let-7a</b>      | 59.5                        |
| <b>5-FU-let-7a</b> | 7.1                         |
| <b>miR-145</b>     | 20.9                        |
| <b>5-FU-145</b>    | 4.9                         |
| <b>5-FU</b>        | 1745.7                      |

743

744 **Table 1. IC<sub>50</sub> values of miRNAs in AGS cells.**

745

746

| <b>Condition</b>   | <b>IC<sub>50</sub> (nM)</b> |
|--------------------|-----------------------------|
| <b>let-7a</b>      | 143.5                       |
| <b>5-FU-let-7a</b> | 22.8                        |
| <b>miR-145</b>     | 151.8                       |
| <b>5-FU-145</b>    | 11.0                        |
| <b>5-FU</b>        | 4612.0                      |

747

748 **Table 2. IC<sub>50</sub> values of miRNAs in A549 cells.**

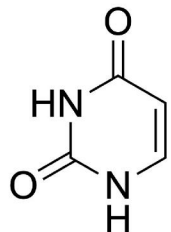

U Uracil

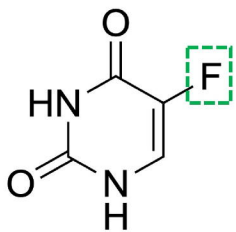

U 5-Fluorouracil

5-FU-let-7a

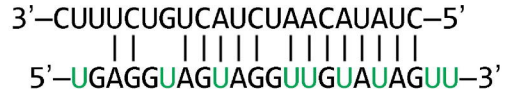

5-FU-miR-15a

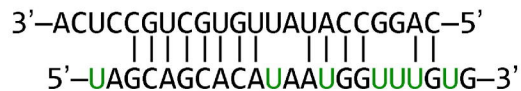

5-FU-miR-34

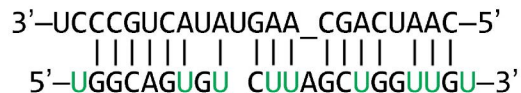

5-FU-miR-129

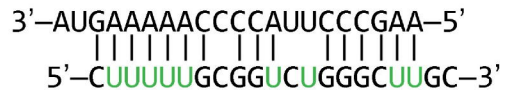

5-FU-miR-140

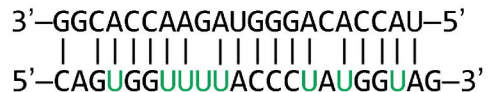

5-FU-miR-145

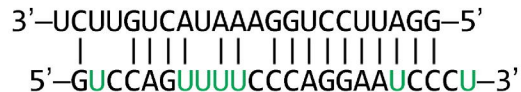

5-FU-miR-194

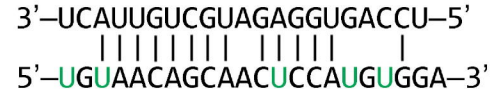

5-FU-miR-200a

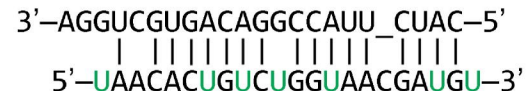

5-FU-miR-200b

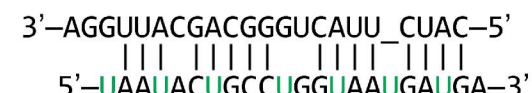

5-FU-miR-200c

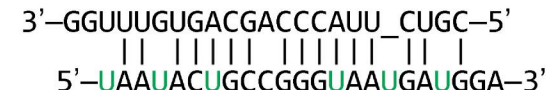

5-FU-miR-215

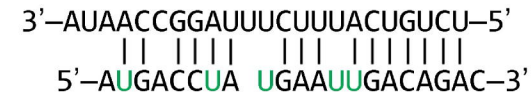

5-FU-miR-506

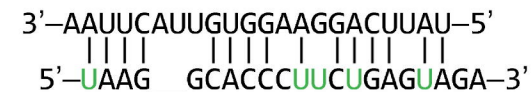

**A**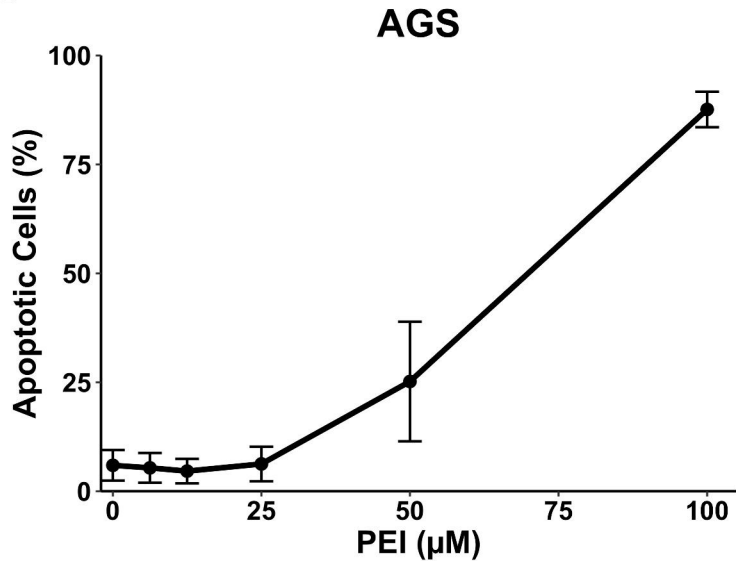**B**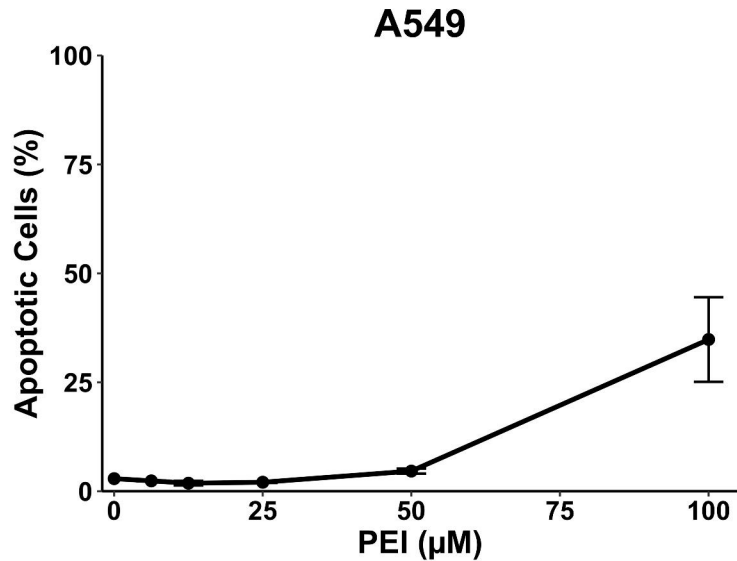

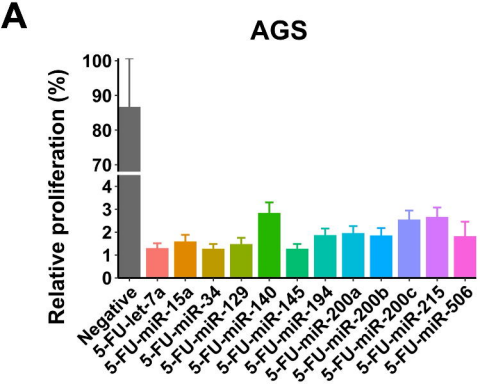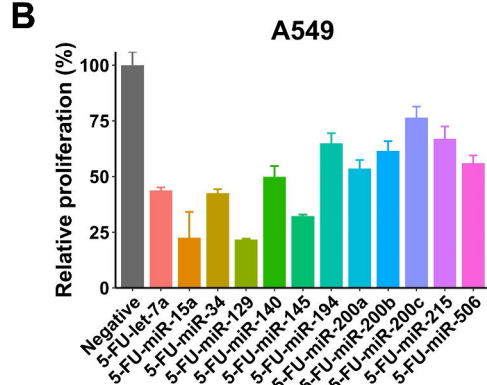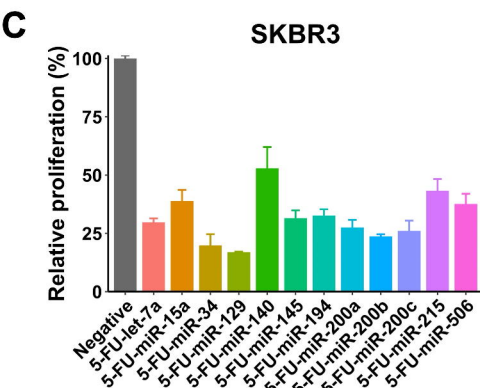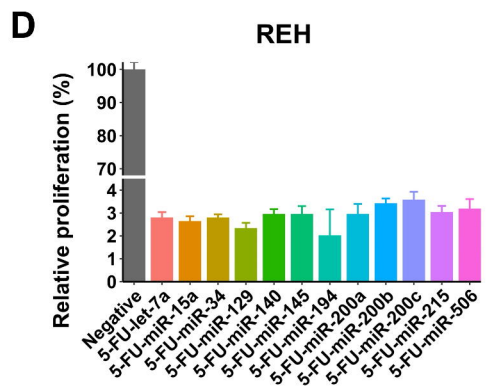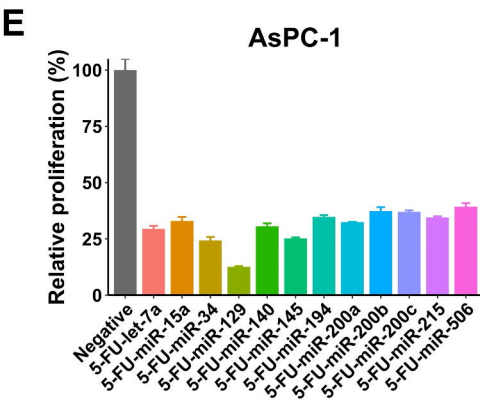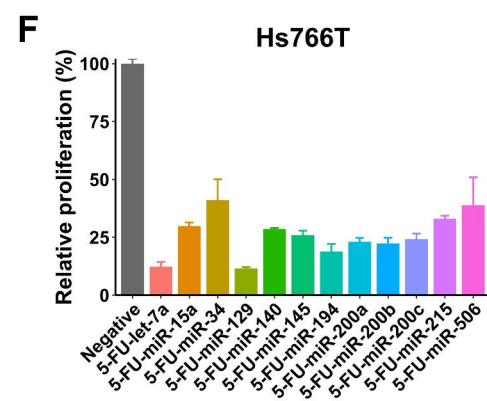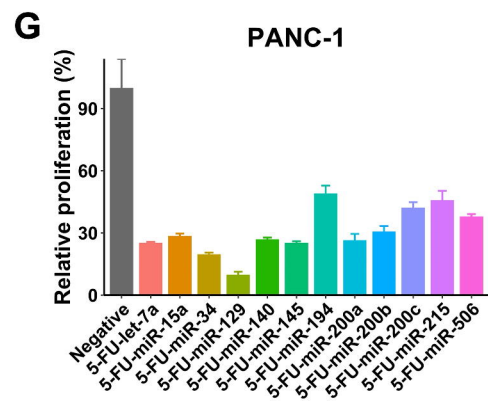

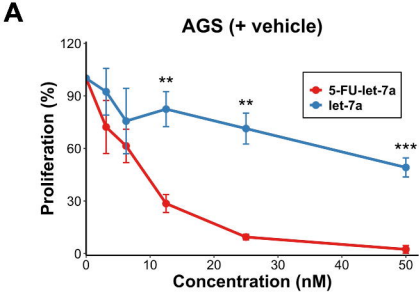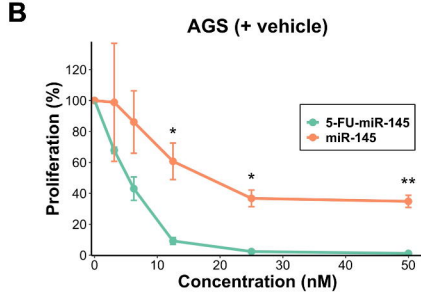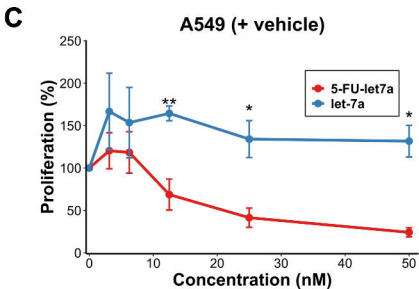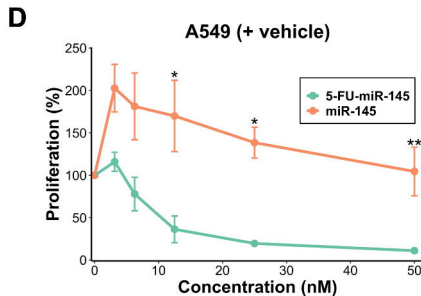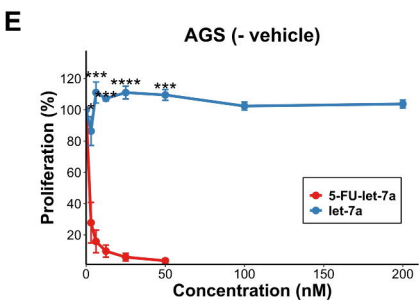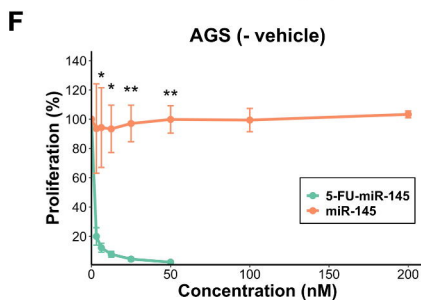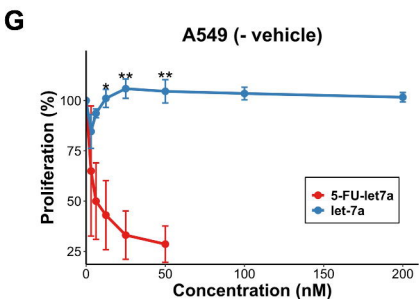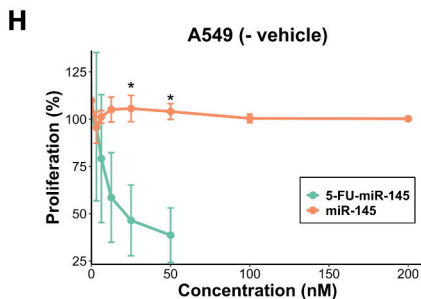

**A**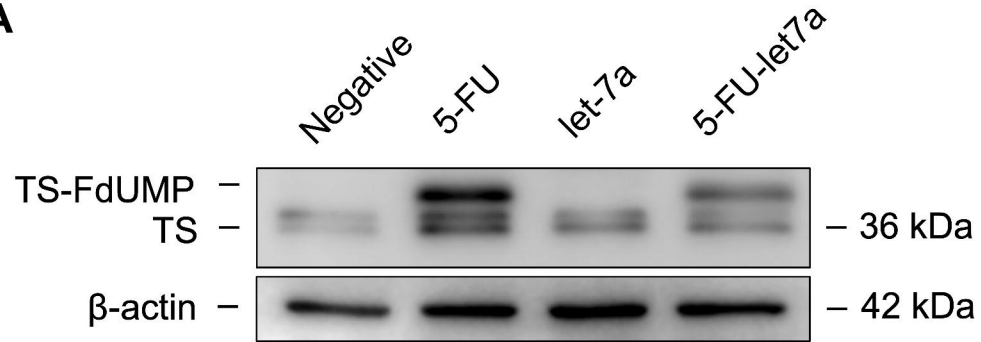**B**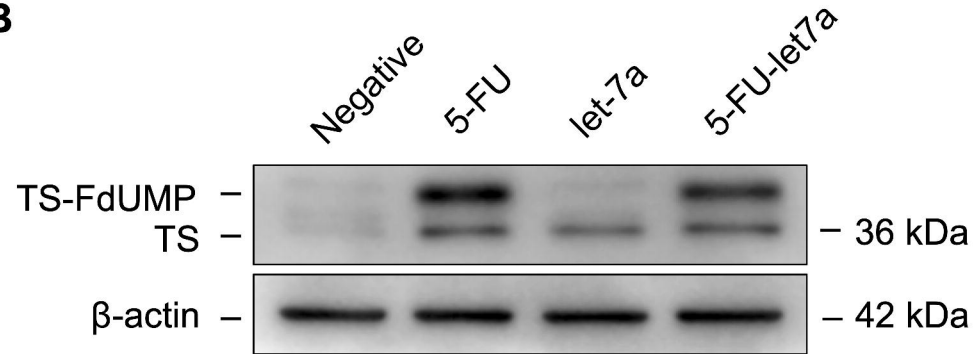**C**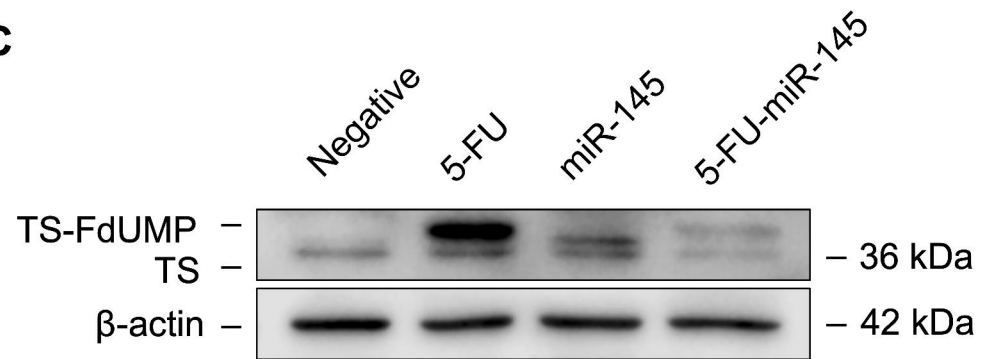**D**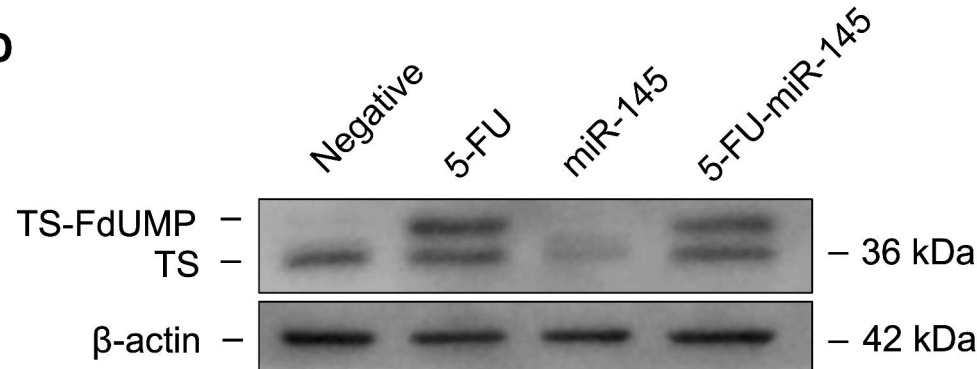

**A**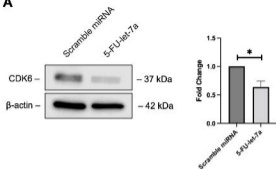**B**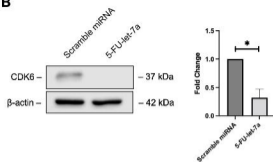**C**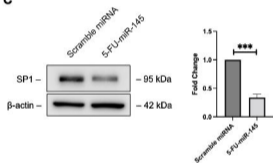**D**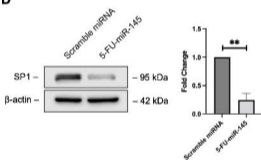**E**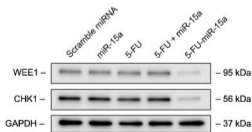

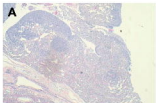

**A**  
Vehicle

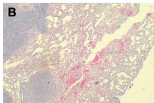

**B**  
5-FU-miR-15a - vehicle

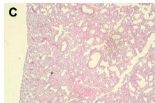

**C**  
5-FU-miR-15a + vehicle

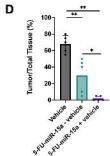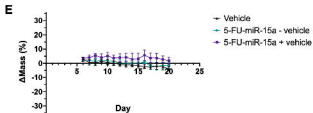

Source: http://biorxiv.org/content/10.1101/2022.06.23.497408v1.full.pdf
